# Supplementary material for: Inequality trends in general health among young people across the 2001, 2011, and 2021 UK Censuses
Source: Research Square preprint supplement (doi:10.21203/rs.3.rs-6782398/v1), 2025-07-17
Supplement: Supplementary file 1 [file d456b70340600231ee671835.pdf]

**Health inequalities among young people in England, Wales and Scotland: a cross-sectional study using data from the UK Censuses. Additional File 1.**

**Supplementary Table 1. Sample exclusions. 2001, 2011 and 2021 datasets, number of observations**

|                                                      | <b>2001</b>    | <b>2011</b>      | <b>2021</b>     |
|------------------------------------------------------|----------------|------------------|-----------------|
| <b>Whole sample</b>                                  | 2, 964, 871    | 2,848,149        | 3, 021, 455     |
| Northern Ireland                                     | 85,380         |                  |                 |
| Sample limited to 10 to 24-year-olds                 | 561, 697       | 618, 633         | 564, 502        |
| <b>Exclusions</b>                                    |                |                  |                 |
| General health not applicable (not usually resident) | 25, 492        | 33,549           | 31, 829         |
| Deprivation measures NA                              | 18,954         | 26, 760          | 27, 395         |
| NS-SEC HRP NA                                        | 57,328         | 94               | 145             |
| Total number of 10-24 year olds                      | 459, 923       | 558,230          | 505, 133        |
| <b>Population base</b>                               |                |                  |                 |
| Usual residents                                      | 459,923 (100%) | 539, 536 (96.7%) | 504,060 (99.8%) |
| Short-term resident                                  |                | 18, 694 (3.3%)   |                 |
| Non-UK-born short-term resident                      |                |                  | 1,073 (0.2%)    |

**Supplementary Table 2. Study characteristics by self-reported health, 2001 (row percentages and p-value\*\*\*<0.001)**

|                                         | <b>2001 (n=459, 923)</b> |                           |             |          |
|-----------------------------------------|--------------------------|---------------------------|-------------|----------|
|                                         | <b>Sample (N)</b>        | <b>General Health (%)</b> |             |          |
|                                         |                          | Good                      | Fairly good | Not good |
| <b>Whole sample</b>                     | 459,923                  | 87.5                      | 10.7        | 1.8      |
| <b>Gender***</b>                        |                          |                           |             |          |
| Male                                    | 231,962                  | 89.3                      | 9.1         | 1.6      |
| Female                                  | 227,961                  | 85.6                      | 12.4        | 2.0      |
| <b>Age***</b>                           |                          |                           |             |          |
| 10 to 15                                | 218,230                  | 91.2                      | 7.8         | 1.0      |
| 16-19                                   | 121,092                  | 86.7                      | 11.5        | 1.8      |
| 20-24                                   | 120,601                  | 81.5                      | 15.4        | 3.1      |
| <b>NSSEC HH Ref person***</b>           |                          |                           |             |          |
| Managerial and professional occupations | 152,989                  | 90.9                      | 7.9         | 1.3      |
| Intermediate occupations                | 34,480                   | 87.8                      | 10.6        | 1.6      |
| Small employers/own account workers     | 53,127                   | 89.9                      | 8.9         | 1.2      |
| Lower supervisory/technical occupations | 51,566                   | 87.5                      | 10.9        | 1.6      |
| Semi-routine/routine occupations        | 114,408                  | 85.1                      | 13.0        | 1.9      |
| Never worked/long-term unemployed       | 19,042                   | 79.4                      | 16.8        | 3.9      |
| Full-time students                      | 4,876                    | 84.2                      | 13.5        | 2.3      |
| Not classified (Only 2001 data)         | 29,435                   | 80.3                      | 15.7        | 4.1      |
| <b>HH deprived by education***</b>      |                          |                           |             |          |
| Deprived                                | 100,801                  | 84.3                      | 13.4        | 2.3      |
| Not deprived                            | 359,122                  | 88.4                      | 10.0        | 1.6      |
| <b>HH deprived by housing***</b>        |                          |                           |             |          |
| Deprived                                | 90,572                   | 84.5                      | 13.3        | 2.3      |
| Not deprived                            | 369,351                  | 88.2                      | 10.1        | 1.7      |
| <b>Region ***</b>                       |                          |                           |             |          |
| North and East of England               | 197,662                  | 87.5                      | 10.7        | 1.8      |
| East and South of England               | 141,683                  | 87.9                      | 10.5        | 1.6      |
| London                                  | 55,597                   | 86.4                      | 11.8        | 1.8      |
| Wales                                   | 24,342                   | 87.6                      | 10.3        | 2.1      |
| Glasgow                                 | 4,542                    | 83.3                      | 13.7        | 3.0      |
| Other Scotland                          | 36,097                   | 87.8                      | 10.3        | 1.9      |

Notes

NSSEC HH Ref person: National Statistics Socio-economic Position of the household reference person

**Supplementary Table 3. Study characteristics by self-reported health, 2011 and 2021 (row percentages and p-value\*\*\*<0.001)**

|                                         | 2011 (n=558, 230) |                    |      |      |     |          | 2021 (n=505, 133) England and Wales |                    |      |      |     |          |
|-----------------------------------------|-------------------|--------------------|------|------|-----|----------|-------------------------------------|--------------------|------|------|-----|----------|
|                                         | Sample (N)        | General health (N) |      |      |     |          | Sample (N)                          | General health (%) |      |      |     |          |
|                                         | N                 | Very good          | Good | Fair | Bad | Very bad | N                                   | Very good          | Good | Fair | Bad | Very bad |
| <b>Whole sample</b>                     | 558, 230          | 71.0               | 24.6 | 3.5  | 0.7 | 0.2      | 505,133                             | 70.7               | 23.6 | 4.6  | 1.0 | 0.2      |
| <b>Gender***</b>                        |                   |                    |      |      |     |          |                                     |                    |      |      |     |          |
| Male                                    | 283,000           | 72.7               | 23.0 | 3.3  | 0.7 | 0.2      | 257,819                             | 72.0               | 22.5 | 4.3  | 0.9 | 0.2      |
| Female                                  | 275,230           | 69.2               | 26.2 | 3.7  | 0.7 | 0.2      | 247,314                             | 69.3               | 24.7 | 4.8  | 1.0 | 0.2      |
| <b>Age***</b>                           |                   |                    |      |      |     |          |                                     |                    |      |      |     |          |
| 10 to 15                                | 213,851           | 78.4               | 18.6 | 20.4 | 0.5 | 0.2      | 211,981                             | 78.4               | 18.0 | 2.9  | 0.6 | 0.2      |
| 16 to 18                                | 109,696           | 72.5               | 23.3 | 3.3  | 0.6 | 0.2      | 95,809                              | 72.0               | 22.4 | 4.5  | 0.9 | 0.2      |
| 19 to 24                                | 234,683           | 63.5               | 30.7 | 4.6  | 1.0 | 0.3      | 197,343                             | 61.7               | 30.1 | 6.5  | 1.4 | 0.4      |
| <b>NSSEC HH Ref person***</b>           |                   |                    |      |      |     |          |                                     |                    |      |      |     |          |
| Managerial and professional occupations | 177,704           | 77.8               | 19.3 | 2.3  | 0.5 | 0.1      | 177,176                             | 77.0               | 19.0 | 3.2  | 0.6 | 0.2      |
| Intermediate occupations                | 55,079            | 70.6               | 25.3 | 3.3  | 0.6 | 0.2      | 46,472                              | 69.7               | 24.7 | 4.5  | 0.9 | 0.2      |
| Small employers/own account workers     | 68,955            | 74.3               | 22.3 | 2.7  | 0.5 | 0.2      | 72,021                              | 74.4               | 21.2 | 3.5  | 0.7 | 0.2      |
| Lower supervisory/technical occupations | 47,237            | 69.8               | 25.9 | 3.5  | 0.7 | 0.2      | 32,583                              | 69.7               | 25.1 | 4.3  | 0.8 | 0.2      |
| Semi-routine/routine occupations        | 140,245           | 65.2               | 29.0 | 4.6  | 1.0 | 0.3      | 121,110                             | 65.2               | 27.5 | 5.8  | 1.2 | 0.3      |
| Never worked/long-term unemployed       | 30,243            | 57.2               | 32.3 | 8.1  | 1.9 | 0.6      | 26,236                              | 55.6               | 29.9 | 10.6 | 2.9 | 1.0      |
| Full-time students                      | 38,767            | 67.3               | 28.4 | 3.7  | 0.5 | 0.2      | 29,535                              | 62.0               | 31.5 | 5.6  | 0.8 | 0.1      |
| <b>HH deprived by education***</b>      |                   |                    |      |      |     |          |                                     |                    |      |      |     |          |
| Deprived                                | 76,391            | 61.5               | 30.8 | 5.9  | 1.4 | 0.4      | 40,015                              | 63.1               | 27.5 | 7.1  | 1.7 | 0.6      |
| Not deprived                            | 481,839           | 72.5               | 23.6 | 3.1  | 0.6 | 0.2      | 465,118                             | 71.3               | 23.2 | 4.4  | 0.9 | 0.2      |
| <b>HH deprived by housing***</b>        |                   |                    |      |      |     |          |                                     |                    |      |      |     |          |
| Deprived                                | 108,806           | 65.9               | 28.7 | 4.3  | 0.9 | 0.3      | 107,566                             | 67.7               | 25.9 | 5.1  | 1.1 | 0.3      |
| Not deprived                            | 449,424           | 72.2               | 23.6 | 3.3  | 0.7 | 0.2      | 397,567                             | 71.5               | 22.9 | 4.4  | 0.9 | 0.2      |

| <b>Region ***</b>         |         |      |      |     |     |     |         |      |      |     |     |     |
|---------------------------|---------|------|------|-----|-----|-----|---------|------|------|-----|-----|-----|
| North and East of England | 233,788 | 70.1 | 25.3 | 3.6 | 0.7 | 0.3 | 227,674 | 70.0 | 24.0 | 4.7 | 1.0 | 0.3 |
| East and South of England | 172,850 | 71.2 | 24.6 | 3.4 | 0.7 | 0.2 | 172,791 | 71.0 | 23.3 | 4.6 | 0.9 | 0.2 |
| London                    | 76,367  | 68.6 | 26.8 | 3.7 | 0.7 | 0.3 | 78,623  | 71.7 | 23.2 | 4.1 | 0.8 | 0.2 |
| Wales                     | 28,300  | 72.3 | 22.8 | 3.8 | 0.8 | 0.3 | 26,045  | 71.4 | 22.5 | 4.8 | 1.1 | 0.2 |
| Glasgow                   | 5,935   | 73.1 | 21.8 | 4.0 | 1.0 | 0.2 | -       | -    | -    | -   | -   | -   |
| Other Scotland            | 40,990  | 77.9 | 18.3 | 3.1 | 0.6 | 0.2 | -       | -    | -    | -   | -   | -   |

**Supplementary Table 4. Odds of reporting poor health by the NSSEC of the household reference person. (\*\*p<0.001 \*\*p<0.005 \*p<0.05)**

|                                                                  | 2001 (n= 459,923) |             | 2011 (n=558, 230) |             | 2021 (n=505,133) |             |
|------------------------------------------------------------------|-------------------|-------------|-------------------|-------------|------------------|-------------|
|                                                                  | OR (95% CI)       |             | OR (95% CI)       |             | OR (95% CI)      |             |
| <b>NSSEC of the HRP (Model 1)</b>                                |                   |             |                   |             |                  |             |
| Managerial and professional occupations                          | 1                 |             | 1                 |             | 1                |             |
| Intermediate occupations                                         | 1.31***           | (1.19-1.44) | 1.43***           | (1.36-1.51) | 1.44***          | (1.38-1.51) |
| Self-employed                                                    | 0.99              | (0.90-1.08) | 1.17***           | (1.11-1.23) | 1.11***          | (1.07-1.16) |
| Lower supervisory/technical occupations                          | 1.27***           | (1.16-1.37) | 1.52***           | (1.44-1.60) | 1.34***          | (1.27-1.42) |
| Semi-routine / routine occupations                               | 1.54***           | (1.45-1.64) | 2.07***           | (1.20-2.15) | 1.92***          | (1.86-1.98) |
| Never worked / long-term unemployed                              | 3.20***           | (2.94-3.49) | 3.94***           | (3.86-4.13) | 4.12***          | (3.95-4.30) |
| Full-time students                                               | 1.90***           | (1.57-2.29) | 1.52***           | (1.44-1.61) | 1.70***          | (1.61-1.79) |
| Not classified (Only 2001)                                       | 3.36***           | (3.12-3.61) | -                 | -           | -                | -           |
| <b>NSSEC age and sex adjusted (Model 2)</b>                      |                   |             |                   |             |                  |             |
| Managerial and professional occupations                          | 1                 |             | 1                 |             | 1                |             |
| Intermediate occupations                                         | 1.19***           | (1.09-1.31) | 1.37***           | (1.30-1.44) | 1.36***          | (1.30-1.43) |
| Self-employed                                                    | 0.99              | (0.91-1.09) | 1.17***           | (1.11-1.23) | 1.11***          | (1.06-1.16) |
| Lower supervisory/technical occupations                          | 1.19***           | (1.10-1.30) | 1.44***           | (1.37-1.52) | 1.28***          | (1.21-1.35) |
| Semi-routine / routine occupations                               | 1.45***           | (1.36-1.54) | 1.97***           | (1.90-2.04) | 1.82***          | (1.76-1.88) |
| Never worked / long-term unemployed                              | 3.17***           | (2.91-3.46) | 3.86***           | (3.68-4.04) | 3.97***          | (3.81-4.14) |
| Full-time students                                               | 1.65***           | (1.36-2.0)  | 1.18***           | (1.11-1.25) | 1.20***          | (1.14-1.26) |
| Not classified (Only 2001)                                       | 3.52***           | (3.27-3.79) | -                 | -           | -                | -           |
| <b>NSSEC Age, sex, deprivation and region adjusted (Model 5)</b> |                   |             |                   |             |                  |             |
| Managerial and professional occupations                          | 1                 |             | 1                 |             | 1                |             |
| Intermediate occupations                                         | 1.15**            | (1.05-1.27) | 1.31***           | (1.25-1.38) | 1.34***          | (1.28-1.41) |
| Self-employed                                                    | 0.94              | (0.86-1.03) | 1.10***           | (1.05-1.16) | 1.08***          | (1.04-1.13) |
| Lower supervisory/technical occupations                          | 1.11*             | (1.02-1.21) | 1.36***           | (1.29-1.43) | 1.24***          | (1.18-1.31) |
| Semi-routine / routine occupations                               | 1.29***           | (1.21-1.37) | 1.74***           | (1.68-1.81) | 1.72***          | (1.66-1.78) |
| Never worked / long-term unemployed                              | 2.66***           | (2.43-2.92) | 3.06***           | (2.91-3.21) | 3.55***          | (3.39-3.71) |
| Full-time students                                               | 1.57***           | (1.29-1.90) | 1.13***           | (1.07-1.20) | 1.18***          | (1.12-1.24) |
| Not classified (Only 2001)                                       | 3.07***           | (2.84-3.31) | -                 | -           | -                | -           |

**Supplementary Table 5. Sensitivity analysis. Odds of reporting poor health by the NS-SEC of the household reference person\*. Gender stratified analysis (\*\*\*p<0.001 \*\*p<0.005 \*p<0.05)**

| <b>2001 Census dataset</b>                   | <b>Girls n=227,961</b> |                 |     | <b>Boys n=231, 962</b> |                 |     |
|----------------------------------------------|------------------------|-----------------|-----|------------------------|-----------------|-----|
|                                              | <b>OR</b>              | <b>(95% CI)</b> |     | <b>OR</b>              | <b>(95% CI)</b> |     |
| Ref: Managerial and professional occupations | 1                      |                 |     | 1                      |                 |     |
| Intermediate occupations                     | 1.23                   | (1.08-1.39)     | **  | 1.05                   | (0.90-1.22)     |     |
| Self-employed                                | 0.88                   | (0.77-0.99)     | *   | 1.02                   | (0.90-1.16)     |     |
| Lower-supervisory/technical occupations      | 1.19                   | (1.07-1.33)     | **  | 1.01                   | (0.89-1.15)     |     |
| Semi-routine/routine occupations             | 1.30                   | (1.19-1.42)     | *** | 1.27                   | (1.15-1.40)     | *** |
| Never worked/long-term unemployed            | 2.47                   | (2.19-2.79)     | *** | 3.00                   | (2.60-3.45)     | *** |
| Full-time students                           | 1.39                   | (1.07-1.80)     | *   | 1.86                   | (1.40-2.48)     | *** |
| Other (only 2001)                            | 2.80                   | (2.51-3.12)     | *** | 3.34                   | (2.99-3.73)     | *** |
|                                              |                        |                 |     |                        |                 |     |
| <b>2011 census dataset</b>                   | <b>Girls n=275,230</b> |                 |     | <b>Boys n=283,000</b>  |                 |     |
| Ref: Managerial and professional occupations | 1                      |                 |     | 1                      |                 |     |
| Intermediate occupations                     | 1.30                   | (1.21-1.39)     | *** | 1.32                   | (1.22-1.42)     | *** |
| Self-employed                                | 1.06                   | (0.99-1.14)     |     | 1.15                   | (1.07-1.24)     | *** |
| Lower-supervisory/technical occupations      | 1.32                   | (1.23-1.43)     | *** | 1.40                   | (1.29-1.51)     | *** |
| Semi-routine/routine occupations             | 1.67                   | (1.58-1.75)     | *** | 1.82                   | (1.72-1.92)     | *** |
| Never worked/long-term unemployed            | 2.68                   | (2.50-2.87)     | *** | 3.54                   | (3.30-3.79)     | *** |
| Full-time students                           | 0.99                   | (0.92-1.08)     |     | 1.30                   | (1.20-1.41)     | *** |
|                                              |                        |                 |     |                        |                 |     |
| <b>2021 census dataset</b>                   | <b>Girls n=247,314</b> |                 |     | <b>Boys n=257,819</b>  |                 |     |
| Ref: Managerial and professional occupations | 1                      |                 |     | 1                      |                 |     |
| Intermediate occupations                     | 1.35                   | (1.27-1.44)     | *** | 1.33                   | (1.24-1.43)     | *** |
| Self-employed                                | 1.07                   | (1.01-1.14)     | *   | 1.10                   | (1.03-1.17)     | **  |
| Lower-supervisory/technical occupations      | 1.17                   | (1.08-1.26)     | *** | 1.33                   | (1.23-1.44)     | *** |
| Semi-routine/routine occupations             | 1.63                   | (1.55-1.70)     | *** | 1.83                   | (1.74-1.92)     | *** |
| Never worked/long-term unemployed            | 3.14                   | (2.94-3.34)     | *** | 4.03                   | (3.78-4.29)     | *** |
| Full-time students                           | 1.09                   | (1.02-1.18)     | *   | 1.28                   | (1.18-1.39)     | *** |

\*Models adjusted for age, household-level deprivation of housing and education, and region
